# Supplementary material
Source: PubMed Central journal article supplement (PMC11027839)
Supplement: 262_2020_2504_MOESM1_ESM.pdf [file 262_2020_2504_MOESM1_ESM.pdf]

**Supplementary Table 1.** Main parameters of the computational model and their associated values. (\*) Value is rescaled by the square of the simulation system characteristic length (1 cm) and divided by the system characteristic time (1 sec) multiplied by the oxygen diffusivity [1] ( $1 \times 10^{-5} \text{ cm}^2 \text{ s}^{-1}$ ).

| Parameter                                                                                  | Value                    | Reference                           |
|--------------------------------------------------------------------------------------------|--------------------------|-------------------------------------|
| Maximum tumor proliferation rate $\lambda_M$                                               | 1 day <sup>-1</sup>      | Measured <i>in vitro</i>            |
| Tumor tissue threshold for hypoxia $\sigma_H$                                              | 0.5750                   | Calibrated to match 3D cell culture |
| Tumor tissue threshold for necrosis $\sigma_N$                                             | 0.5325                   | Calibrated to match 3D cell culture |
| Tumor native apoptosis rate $\lambda_A$                                                    | 0 (*)                    | [2]                                 |
| Tumor rate of volume loss in necrotic regions $G_N$                                        | 0.3 (*)                  | [2]                                 |
| nab-PTX transfer rate from MSV-nab-PTX macrophages $\bar{\lambda}_{ev}^s$                  | 5 (*)                    | [3]                                 |
| nab-PTX diffusivity $D_s$                                                                  | 0.25 (*)                 | Estimated from experimental data    |
| nab-PTX uptake rate by proliferating tumor cells $\lambda^s$                               | 1.5 (*)                  | [3]                                 |
| nab-PTX decay rate $\alpha$                                                                | 20 hr. half-life         | [4]                                 |
| MSV per MSV-nab-PTX macrophage                                                             | 10                       | Measured <i>in vitro</i>            |
| nab-PTX per MSV                                                                            | 0.0015 ng                | Measured <i>in vitro</i>            |
| Paclitaxel per nab-PTX molecule                                                            | 10%                      | [4]                                 |
| nab-PTX <i>in vitro</i> EC50 (48 hrs.) for 4T1 cells (monolayer)                           | 125 ng/mL                | Measured <i>in vitro</i>            |
| Percentage of macrophages per tumor lesion total cells                                     | 10%                      | Measured <i>in vitro</i>            |
| Resistance differential between monolayer and 3D cell culture when macrophages are present | 1                        | Measured <i>in vitro</i>            |
| Number of macrophages needed <i>in vivo</i> to attain EC50 <i>in vitro</i>                 | 27,778 / mm <sup>3</sup> | Calculated from experimental data   |
| M1-induced death rate $\lambda_{NO}$                                                       | 5 /s                     | Estimated from experimental data    |
| M2 growth factor strength $\lambda_F$                                                      | 1000 /s                  | Estimated from experimental data    |
| nab-PTX -induced death effect $\bar{\lambda}_{effect}$                                     | 8275                     | Calibrated to match 3D cell culture |
| Diffusivity of agent affecting macrophage polarization (AAMP) $D_N$                        | 0.25 (*)                 | Similar to nab-PTX                  |
| Release rate of AAMP from vasculature $\lambda_{release}^N$                                | 0.5 (*)                  | Assumed half that of O <sub>2</sub> |
| AAMP drug decay rate $\lambda_{decay}^N$                                                   | 20 hr. half life         | Similar to nab-PTX                  |

**Supplementary Figures**

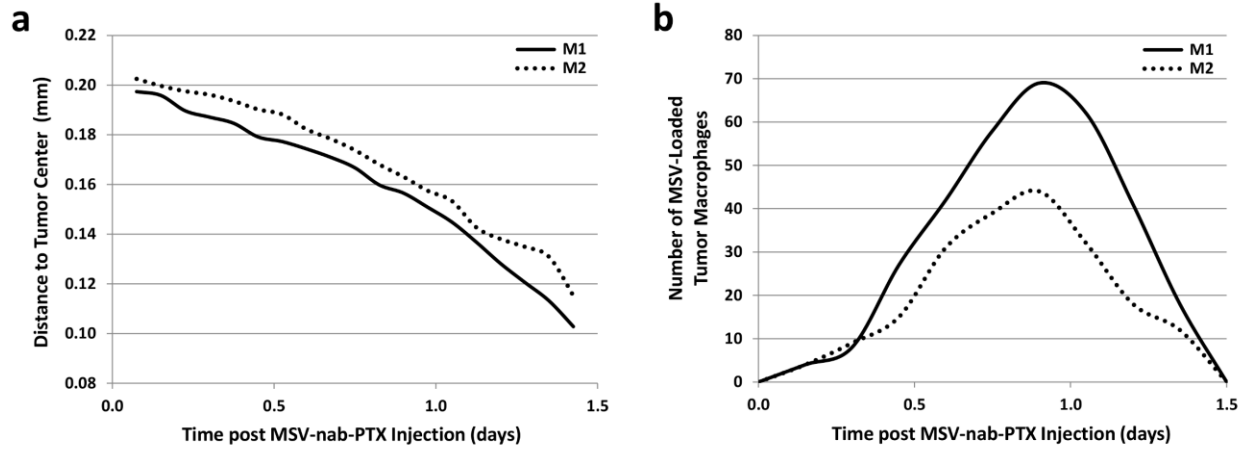

**Supplementary Fig 1** Simulated tumor macrophage populations post systemic injection of MSV-nab-PTX. (a) Macrophage penetration and (b) number of MSV-nab-PTX loaded macrophages in a simulated breast cancer liver metastatic (BCLM) tumor lesion.

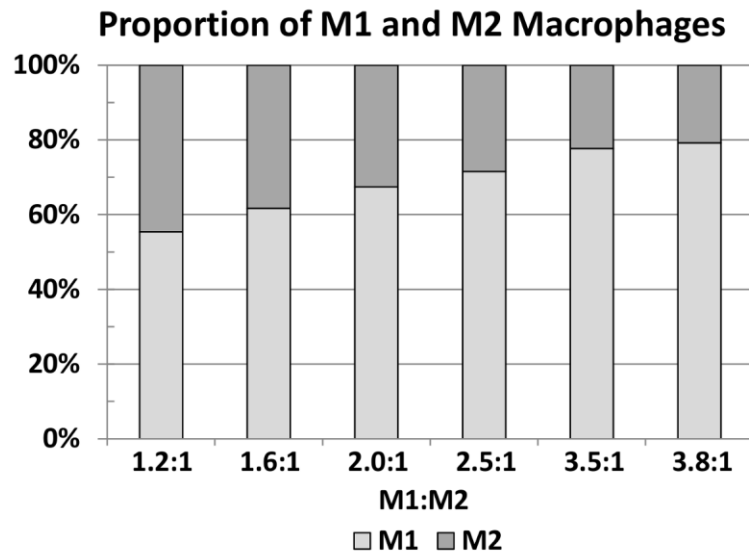

**Supplementary Fig 2** Effect of a hypothetical “agent affecting macrophage polarization” (AAMP) on the simulated proportion of tumor-associated macrophages. An increasing ratio of M1 to M2 subtypes is achieved with increasing strength of the agent.

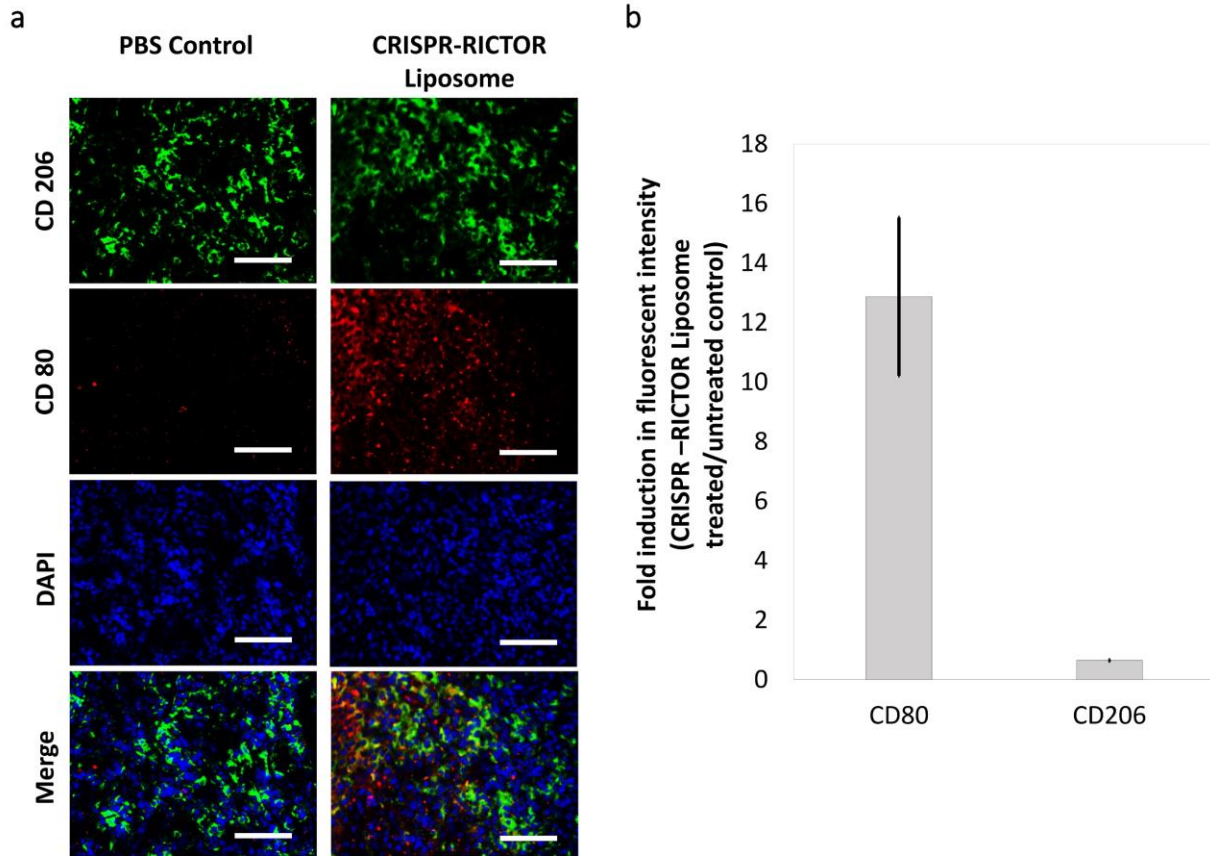

**Supplementary Fig 3** Immunofluorescence analysis of 4T1 breast tumors 24h after CRISPR-RICTOR-Liposome treatment *in vivo* vs. untreated (injected with PBS) control. Tumors were stained for CD 80 (M1 marker) and CD206 (M2 marker) expression. (a) Immunofluorescence of tumor sections. (b) Quantification of CD80 and CD206 expression from histology. Mean±SD, n=6, scale bar=100µm.

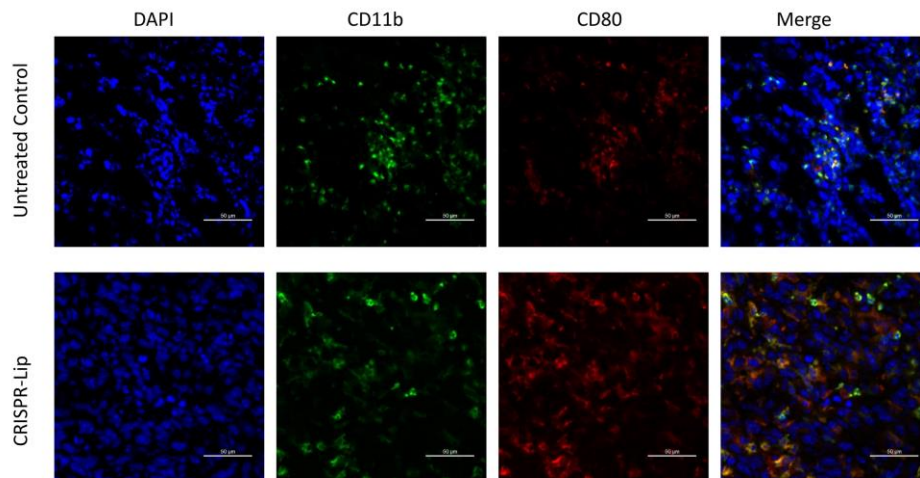

**Supplementary Fig 4** Immunofluorescence analysis of 4T1 tumors 24h after CRISPR-RICTOR-Liposome (CRISPR-Lip) treatment *in vivo* vs. Untreated (injected with PBS) control. To confirm that CD80 signal originates in macrophages of M1 phenotype, tumors were co-stained for CD80 (M1 marker, red) and CD11b (pan-macrophage marker, green). Scale bar=50µm.

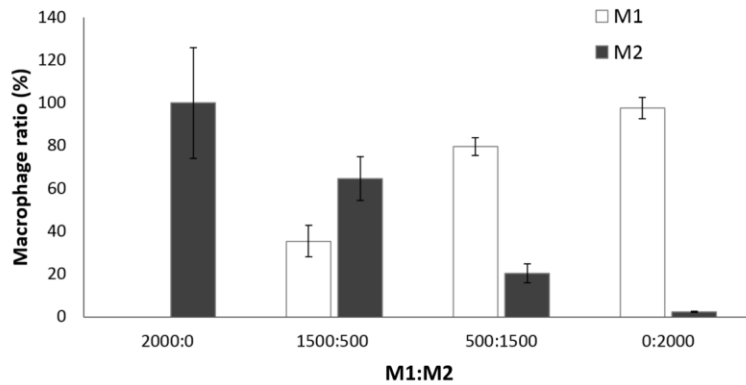

**Supplementary Fig 5** Phenotype of macrophages with different M1:M2 ratios cocultured with tumor spheroids was assessed after 48h. M1 macrophages were CRISPR-treated and differentiated in the presence of IFN-gamma/LPS, while M2 macrophages were polarized *in vitro* in the presence of IL-4/M-CSF. Macrophages were stained with CD80 antibody for M1 marker and with CD204 antibody for M2 marker. Staining signals were analyzed with NIS Elements and the ratios were calculated. Mean±SEM, biological replicates n=4.

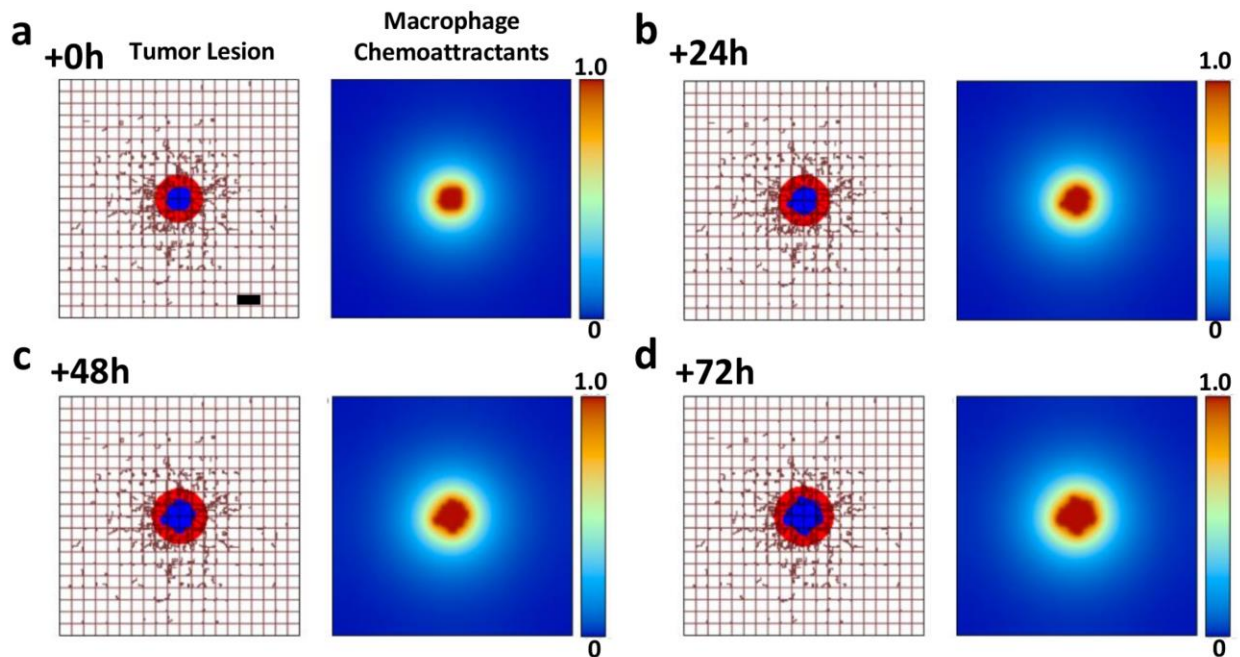

**Supplementary Fig 6** Simulation of a representative BCLM lesion. The lesion is shown growing over a period of 72h (a through d) with viable tumor tissue (red) enclosing a hypoxic region (blue) without necrosis. The dense liver capillary network is modeled by the rectangular grid (brown), with irregular sprouts generated through angiogenesis during the lesion progression. During this growth, macrophage chemoattractants (non-dimensional units) are increasingly released by the tumor cells into the surrounding microenvironment. Bar= 200  $\mu$ m.

## References

1. Nugent LJ, Jain RK (1984) Extravascular diffusion in normal and neoplastic tissues. *Cancer Research* 44 (1):238-244
2. Wu M, Frieboes HB, McDougall SR, Chaplain MAJ, Cristini V, Lowengrub J (2013) The effect of interstitial pressure on tumor growth: Coupling with the blood and lymphatic vascular systems. *J Theor Biol* 320:131-151. doi:10.1016/j.jtbi.2012.11.031
3. van de Ven AL, Wu M, Lowengrub J, McDougall SR, Chaplain MAJ, Cristini V, Ferrari M, Frieboes HB (2012) Integrated intravital microscopy and mathematical modeling to optimize nanotherapeutics delivery to tumors. *AIP Advances* 2 (1). doi:10.1063/1.3699060
4. Abraxane® (paclitaxel protein-bound particles for injectable suspension)(albumin-bound) (2015). Product Monograph Celgene Inc. ,
